# Supplementary material for: Modulation of the Gut Microbiota by Tomato Flours Obtained after Conventional and Ohmic Heating Extraction and Its Prebiotic Properties
Source: MDPI journal article supplement (doi:10.3390/foods12091920), 2023-05-08
Supplement: s1 [file s1]

## Supplementary material

Table S1. Real time PCR conditions.

| PCR stage                                  | Temperature (°C)                             | Time (s) | Number of cycles |
|--------------------------------------------|----------------------------------------------|----------|------------------|
| Initial denaturation/<br>enzyme activation | 95                                           | 600      | 45               |
| Denaturation                               | 95                                           | 10       |                  |
| Annealing                                  | Specific temperature for each primer         | 60       |                  |
| Extension*                                 | 72                                           | 15       |                  |
| Melting curve*                             | 60-97, with an increment of 0.5 for 0.05 min | 0.05     |                  |

\*Stages in which fluorescence is measured

Table S2. Primer sequences targeting bacterial groups, genomic DNA standards and PCR product size.

|                                              | Primer  | Sequence                            | Genomic DNA standard         | PCR Product size | Annealing temperatures (°C) |
|----------------------------------------------|---------|-------------------------------------|------------------------------|------------------|-----------------------------|
|                                              |         |                                     |                              |                  |                             |
| <b>Firmicutes</b>                            | Forward | ATG TGG TTT AAT TCG AAG CA          | <i>Lactobacillus gasseri</i> | 126              | 45                          |
|                                              | Reverse | AGC TGA CGA CAA CCA TGC AC          | ATCC 33323                   |                  |                             |
| <b>Bacteroidetes</b>                         | Forward | CAT GTG GTT TAA TTC GAT GAT         | <i>Bacteroides vulgatus</i>  | 126              | 45                          |
|                                              | Reverse | AGC TGA CGA CAA CCA TGC AG          | ATCC 8482                    |                  |                             |
| <b>Bacteroides</b>                           | Forward | ATA GCC TTT CGA AAG RAA GAT         | <i>Bacteroides vulgatus</i>  | 495              | 45                          |
|                                              | Reverse | CCA GTA TCA ACT GCA ATT TTA         | ATCC 8482                    |                  |                             |
| <b><i>Clostridium leptum</i> subgroup IV</b> | Forward | GCA CAA GCA GTG GAG T               | <i>Clostridium leptum</i>    | 239              | 45                          |
|                                              | Reverse | CTT CCT CCG TTT TGT CAA             |                              |                  |                             |
| <b>Lactobacillus</b>                         | Forward | GAG GCA GCA GTA GGG AAT CTT C       | <i>Lactobacillus gasseri</i> | 126              | 55                          |
|                                              | Reverse | GGC CAG TTA CTA CCT CTA TCC TTC TTC | ATCC 33323                   |                  |                             |

|                        |         |                         |                                               |     |    |
|------------------------|---------|-------------------------|-----------------------------------------------|-----|----|
| <b>Bifidobacterium</b> | Forward | CGC GTC YGG TGT GAA AG  | <i>Bifidobacterium longum subsp. Infantis</i> | 244 | 50 |
|                        | Reverse | CCC CAC ATC CAG CAT CCA | ATCC 15697                                    |     |    |
| <b>Roseburia</b>       | Forward | AGGCGGTACGGCAAGTCT      | Roseburia intestinalis DSM14610               |     | 56 |
|                        | Reverse | AGGCGGTACGGCAAGTCT      |                                               |     |    |
| <b>Prevotella</b>      | Forward | CACCAAGGCGACGATCA       | Prevotella                                    | 283 | 56 |
|                        | Reverse | GGATAACGCCCGGACCT       |                                               |     |    |

Table S3. The proximate composition and total phenolic compounds of SFOH and SFCONV samples (g/100g).

| Chemical Composition<br>(g/100g DW) |                                     | Sample (g/100 g) |              |
|-------------------------------------|-------------------------------------|------------------|--------------|
|                                     |                                     | SFOH             | SFCONV       |
| <b>Proximate composition</b>        | <i>Ash</i>                          | 3.32 ± 0.21      | 2.98 ± 0.16  |
|                                     | <i>Protein</i>                      | 18.72 ± 0.47*    | 16.29 ± 0.59 |
|                                     | <i>Total Fatty acids</i>            | 21.12 ± 0.51*    | 17.82 ± 0.3  |
|                                     | <i>Dietary Fiber</i>                |                  |              |
|                                     | <i>TDF</i>                          | 62.47 ± 1.24*    | 59.06 ± 0.67 |
|                                     | <i>IDF</i>                          | 50.99 ± 0.16*    | 46.01 ± 0.13 |
|                                     | <i>SDF</i>                          | 10.86 ± 0.85*    | 12.98 ± 0.64 |
| <b>Phenolic composition</b>         | <i>TPC</i>                          | 1.46 ± 0.05*     | 0.8 ± 0.01   |
|                                     | <b>Free phenolic extract (FPC)</b>  |                  |              |
|                                     | <i>ABTS</i>                         | 0.28 ± 0.01      | 0.99 ± 0.15* |
|                                     | <i>ORAC</i>                         | 2.44 ± 0.34*     | 1.6 ± 0.09   |
|                                     | <i>TPC</i>                          | 0.42 ± 0.03      | 0.73 ± 0.12* |
|                                     | <b>Bound phenolic extract (BPC)</b> |                  |              |
|                                     | <i>ABTS</i>                         | 2.23 ± 0.21      | 2.63 ± 0.11  |
|                                     | <i>ORAC</i>                         | 2.41 ± 0.22      | 2.71 ± 0.43  |

Values are the mean of three replicates of three independent experiments ± standard deviation. TDF- total dietary fiber; IDF; insoluble dietary fiber; SDF- soluble dietary fiber; TPC- total phenolic compounds (g gallic acid Eq./100g DW); ABTS Antioxidant activity by ABTS method (g ascorbic acid eq. / 100 gDW); ORAC- antioxidant activity (g trolox eq./ 100g DW). Values marked by the asterisk within the same column are statistically significantly different (determined by ANOVA, p < 0.05).

Table S4. Constituents (g/100 g fibre DW) of SDF and IDF from SFOH and SFCONV samples.

|                                   | SFOH                      |                           | SFCONV                   |                           |
|-----------------------------------|---------------------------|---------------------------|--------------------------|---------------------------|
|                                   | SDF                       | IDF                       | SDF                      | IDF                       |
| <b>Klason Lignin</b>              |                           | 13.06 ± 0.52 <sup>b</sup> |                          | 14.09 ± 0.27 <sup>a</sup> |
| <b>Glucose<br/>(as cellulose)</b> | 24.42 ± 0.43 <sup>a</sup> | 55.32 ± 1.21 <sup>b</sup> | 32.1 ± 0.56 <sup>c</sup> | 50.23 ± 1.76 <sup>d</sup> |

|                                             |                           |                           |                           |                           |
|---------------------------------------------|---------------------------|---------------------------|---------------------------|---------------------------|
| <b>Hemicellulose</b>                        | 15.12 ± 0.54 <sup>a</sup> | 25.2 ± 0.10 <sup>b</sup>  | 12.71 ± 1.21 <sup>a</sup> | 24.72 ± 0.30 <sup>b</sup> |
| <b>Xylose</b>                               | *                         | 13.2 ± 0.10 <sup>a</sup>  | *                         | 15.1 ± 0.17 <sup>b</sup>  |
| <b>Galactose</b>                            | 1.87 ± 0.21               | *                         | *                         | 0.31 ± 0.021              |
| <b>Manose</b>                               | *                         | *                         | 4.10 ± 0.12 <sup>a</sup>  | *                         |
| <b>Arabinose</b>                            | 13.25 ± 0.86              | 12.81 ± 0.28              | 12.71 ± 1.21              | 9.31 ± 0.51               |
| <b>Uronic acids<sup>*1</sup></b>            | 67.41 ± 2.15 <sup>a</sup> | 81.92 ± 1.98 <sup>b</sup> | 58.93 ± 2.56 <sup>c</sup> | 78.49 ± 2.32 <sup>b</sup> |
| <b>Resistant Protein</b>                    |                           | 16.03 ± 0.05 <sup>a</sup> |                           | 11.69 ± 0.03 <sup>b</sup> |
| <b>Bond Phenolic compounds<sup>*2</sup></b> | 7.80 ± 0.43 <sup>a</sup>  | 31.18 ± 2.31 <sup>b</sup> | 4.99 ± 0.35 <sup>c</sup>  | 34.10 ± 1.21 <sup>b</sup> |

\* < LOD. TDT - Total dietary fibre; IDF – insoluble dietary fibre; SDF – Soluble dietary fibre. <sup>\*1</sup> - mg GUAЕ / g fibre dry weight; <sup>\*2</sup> - mg GAE/ 100g fibre DW. Results are the means of three determinations ± standard deviation. Different letters in the same column are significantly different, as determined by ANOVA (p< 0.05).

Table S5. Recovery index and bioaccessibility of total phenolic compounds, antioxidant activity, and individual phenolic compounds from SFCONV and SFOH samples throughout digestion.

| <b>Bioactivities</b>  | <b>Samples</b> | <b>Mouth</b>               | <b>Colon</b>               |
|-----------------------|----------------|----------------------------|----------------------------|
| Total Phenol          | SFCONV         | 101.42 ± 2.34 <sup>a</sup> | 90.78 ± 1.12 <sup>d</sup>  |
|                       | SFOH           | 70.44 ± 1.56 <sup>a</sup>  | 103.04 ± 1.28 <sup>d</sup> |
| ABTS                  | SFCONV         | 103.08 ± 2.23 <sup>a</sup> | 98.49 ± 2.45 <sup>a</sup>  |
|                       | SFOH           | 81.45 ± 1.87 <sup>a</sup>  | 92.51 ± 1.96               |
| Orac (trolox eq.)     | SFCONV         | 109.34 ± 2.25 <sup>a</sup> | 90.49 ± 2.54               |
|                       | SFOH           | 89.19 ± 2.54 <sup>a</sup>  | 87.50 ± 1.26               |
| gallic acid           | SFCONV         | 101.19 ± 1.87 <sup>a</sup> | n.d.                       |
|                       | SFOH           | 134.31 ± 1.12              | n.d.                       |
| 4-hydroxybenzoic acid | SFCONV         | 100.38 ± 1.56 <sup>a</sup> | n.d.                       |
|                       | SFOH           | 102.54 ± 1.69 <sup>a</sup> | 70.98 ± 0.13 <sup>c</sup>  |
| p-coumaric acid       | SFCONV         | 79.35 ± 2.56 <sup>a</sup>  | 36.15 ± 0.89 <sup>d</sup>  |

|       |        |                           |                          |
|-------|--------|---------------------------|--------------------------|
|       | SFOH   | 89.07 ± 1.98 <sup>a</sup> | 0.42 ± 0.03 <sup>d</sup> |
| rutin | SFCONV | 17.01 ± 0.54 <sup>a</sup> | n.d.                     |
|       | SFOH   | 7.84 ± 0.05 <sup>a</sup>  | n.d.                     |

n.d. not determined. Recovery index and bioaccessibility %. Results are the means of three determinations ± standard deviation. Different letters in the same line are significantly different (p<0.05), the greek alphabet means significant differences between methods used in the same column (p<0.05). as determined by ANOVA (p< 0.05).

Table S6. Recover index and bioaccessibility percent of carotenoids identified by mass spectrometry LC-ESI-UHR-QqTOF-MS to OH and extracts.

|             |     | Mz |  | Mouth (%)     |              | Colon (%)    |              |
|-------------|-----|----|--|---------------|--------------|--------------|--------------|
| Samples     |     |    |  | OH            | CONV         | OH           | CONV         |
| n.i         | 525 |    |  | 84.85 ± 2.31  | 86.32 ± 2.05 | 40.33 ± 1.87 | 41.32 ± 1.98 |
| n.i         | 527 |    |  | 91.55 ± 1.95  | 93.41 ± 1.28 | 92.48 ± 2.06 | 90.23 ± 2.77 |
| phytofluene | 542 |    |  | 72.25 ± 1.04  | 26.40 ± 0.27 | 69.82 ± 1.76 | 35.54 ± 1.43 |
| lycopene    | 536 |    |  | n.q           | n.q          | n.q          | n.q          |
| lutein      | 569 |    |  | 113.94 ± 2.76 | 25.53 ± 0.34 | 19.26 ± 1.25 | 30.53 ± 1.23 |
| n.i.        | 633 |    |  | 103.78 ± 2.54 | n.d          | 12.98 ± 0.12 | n.d          |

n.i. non identified; n.d. non determinate; n.i. non identified .

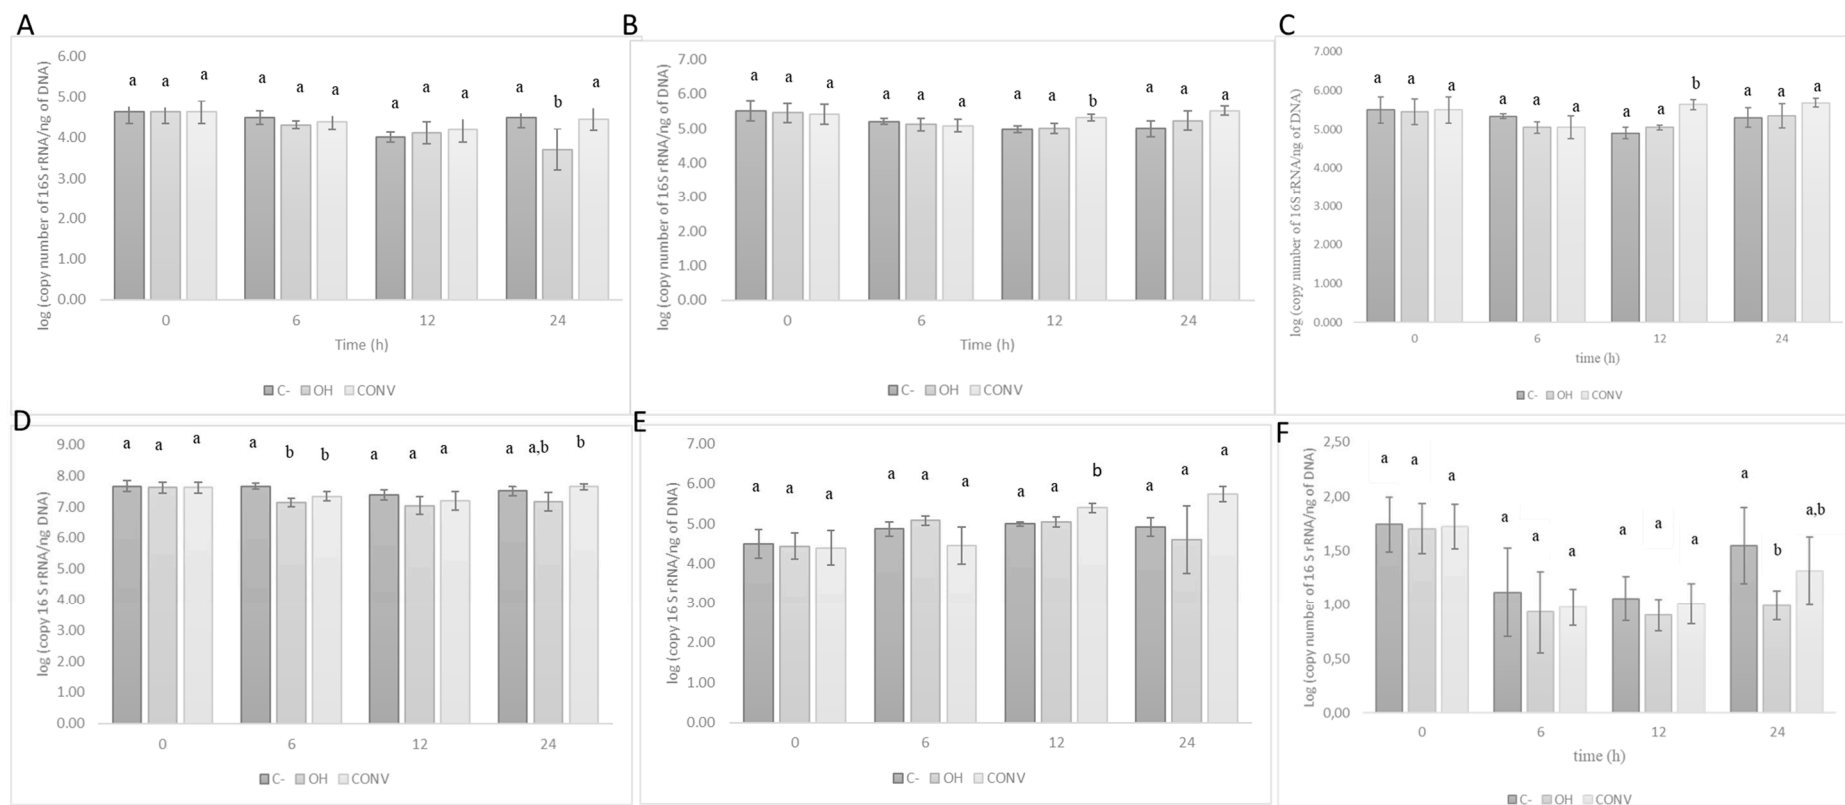

Figure S1. Bacterial populations (log (copy number of 16 S rRNA/ng of DNA), means  $\pm$  SD) detected by PCR in Fecal samples. The used probes: *Clostridium leptum* (A), *Bacteroidetes* (B), *Bacteroides* (C), *Firmicutes* (D), *Bifidobacterium* (E), and *Akkermansia* (F) Different letters mark statistically significant ( $p < 0.05$ ) differences between samples at each sampling point.
